# Supplementary material for: Sb2Se3 nanorods with N-doped reduced graphene oxide hybrids as high-capacity positive electrode materials for rechargeable aluminum batteries
Source: Royal Society of Chemistry journal article supplement (doi:10.1039/c9nr06481h), 2019-01-01
Supplement: c9nr06481h1.pdf [file c9nr06481h1.pdf]

## Supporting Information

### **Sb<sub>2</sub>Se<sub>3</sub> nanorods with N-doped reduced graphene oxide hybrids as high-capacity positive electrode materials for rechargeable aluminum batteries**

Wei Guan,<sup>a</sup> Lijun Wang,<sup>a,\*</sup> Haiping Lei,<sup>b</sup> Jiguo Tu<sup>b</sup> and Shuqiang Jiao<sup>b,\*</sup>

<sup>a</sup> Division of Rare Metals Metallurgy and Materials, GRIMAT Engineering Institute Co., Ltd, Beijing, 100088, PR China.

<sup>b</sup> State Key Laboratory of Advanced Metallurgy, University of Science and Technology Beijing, Beijing 100083, PR China.

\*Corresponding authors: E-mail: sjiao@ustb.edu.cn (S Jiao) and gold@grinm.com (L Wang)

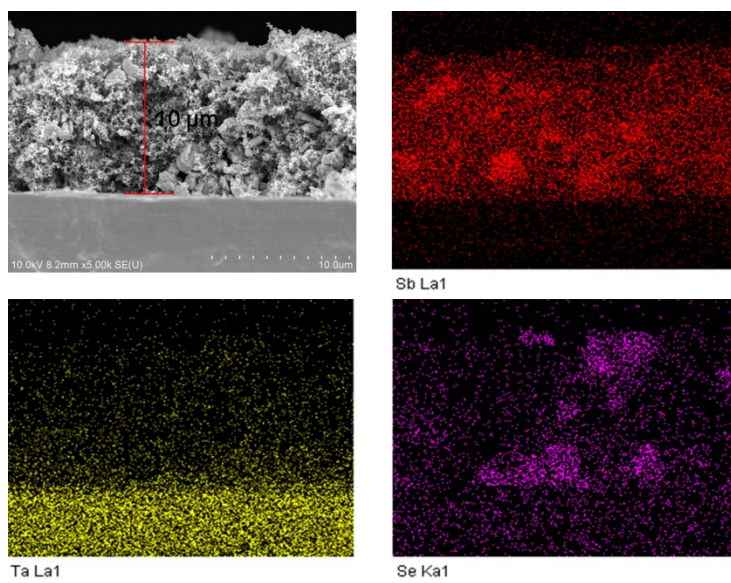

**Fig. S1** The SEM images and EDS spectra of electrode.

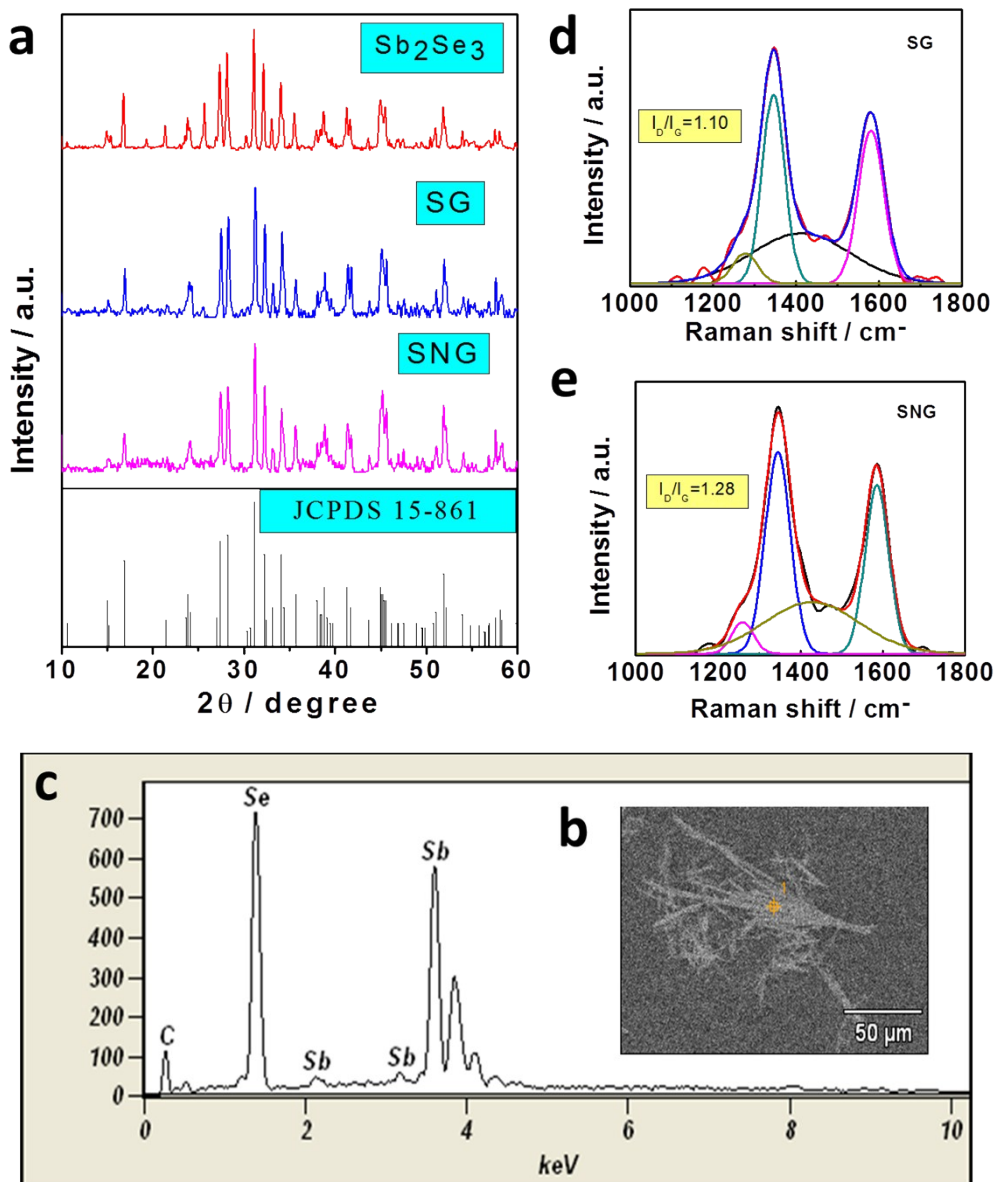

**Fig. S2** (a) The XRD spectra of SNG, SG and Sb<sub>2</sub>Se<sub>3</sub>. (b) The SEM image of Sb<sub>2</sub>Se<sub>3</sub>. (c) The EDS spectra of Sb<sub>2</sub>Se<sub>3</sub>. (d) Raman spectrum of SG. (e) Raman spectrum of SNG.

**Table S1.** The weight ratio and atom ratio of Sb<sub>2</sub>Se<sub>3</sub>

|          | <i>Se-K</i> | <i>Sb-L</i> |
|----------|-------------|-------------|
| Weight % | 42.76       | 46.82       |
|          | <i>Se-K</i> | <i>Sb-L</i> |
| Atom %   | 30.18       | 21.43       |

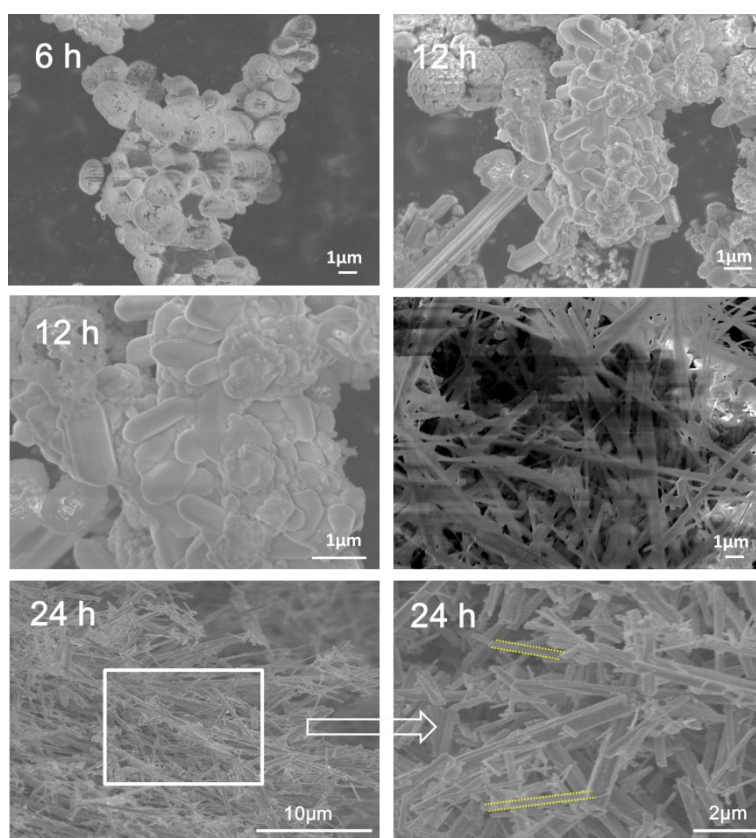

**Fig. S3** SEM images of the product corresponding to different reaction times

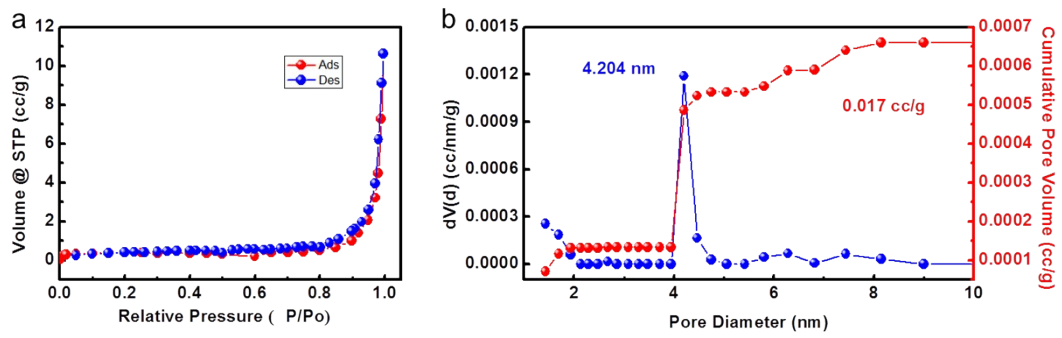

**Fig. S4** (a) N<sub>2</sub> adsorption/desorption isotherm plots of Sb<sub>2</sub>Se<sub>3</sub>. (b) The micropore size distribution and the total mesopore volume of the samples, calculated using the BJH method

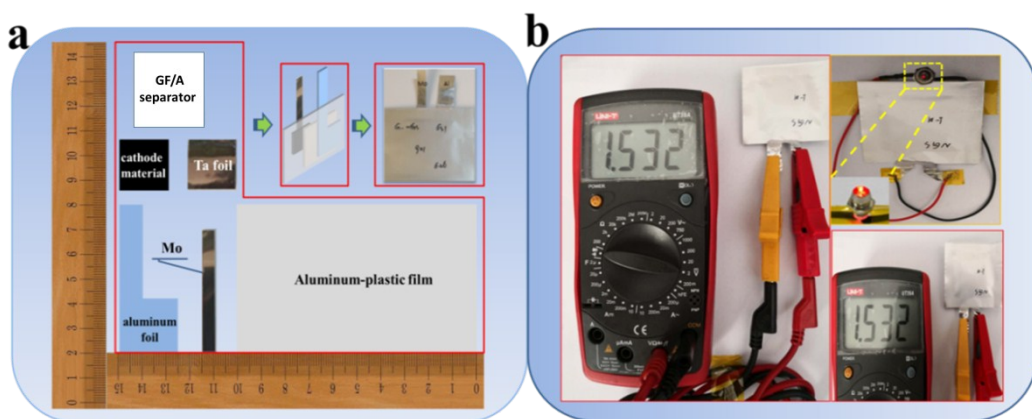

**Fig. S5** (a) The assembly diagram of soft package aluminum battery. (b) Open circuit voltage of an aluminum battery based on SNG positive electrode material, and the battery can make the LED light shine.

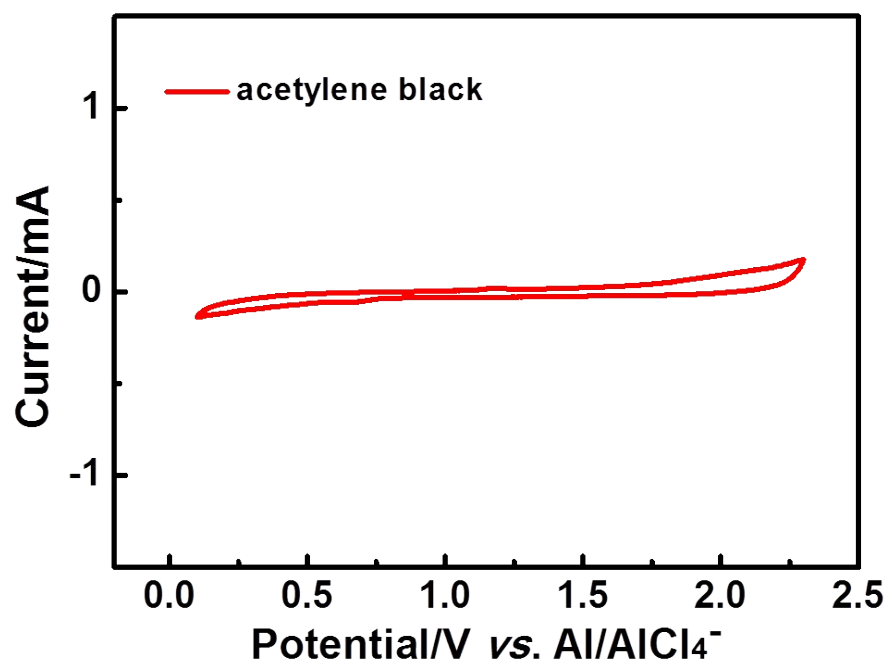

**Fig. S6** The CV curves of acetylene black at a scan rate of 1 mV s<sup>-1</sup>.



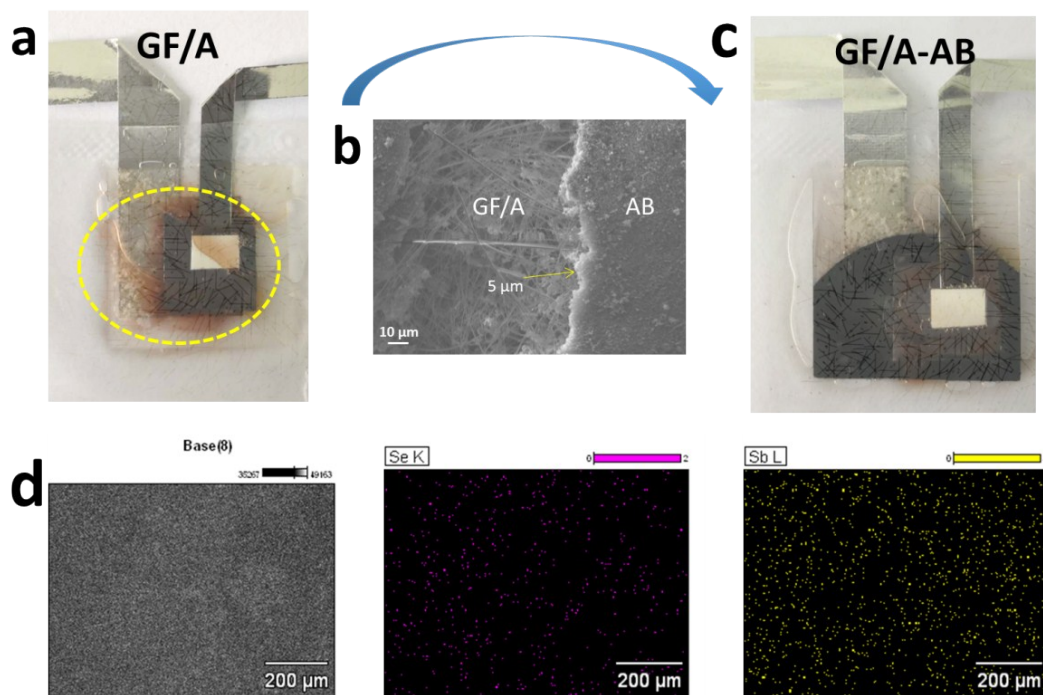

**Fig. S7** (a) Ordinary separator (GF/A) is used in aluminum batteries. (b) The SEM image of modified separator (GF/A-AB). (c) Modified separator is used in aluminum batteries. (d) The EDS spectra of modified separator after 5 cycles.

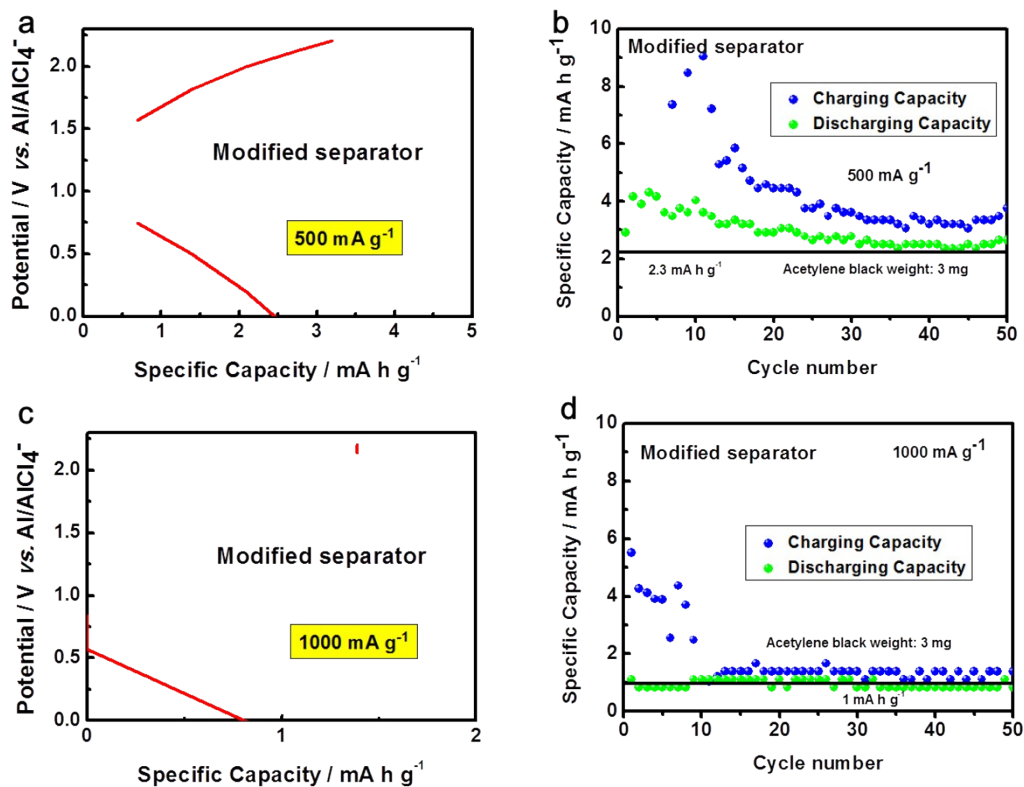

**Fig. S8** (a, b) The charge and discharge curves and cycling performance of modified separator (Acetylene black) in the potential range of 0.01-2.2 V at a current density of  $500 \text{ mA g}^{-1}$ . (c, d) The charge and discharge curves and cycling performance of modified separator (Acetylene black) in the potential range of 0.01-2.2 V at a current density of  $1000 \text{ mA g}^{-1}$ .

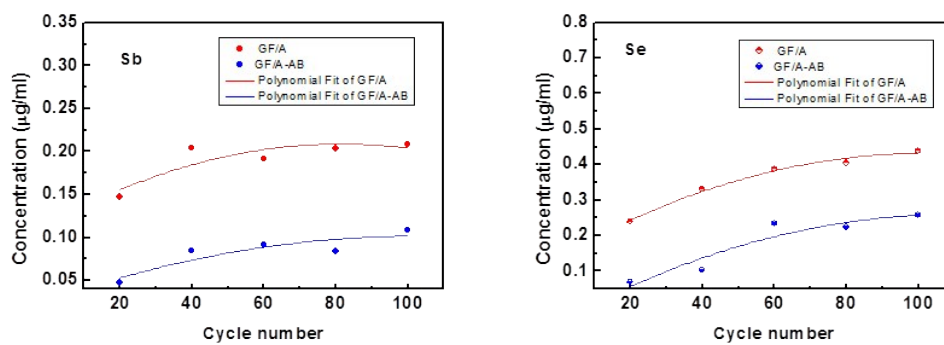

Fig. S9 ICP-determined Sb/Se species concentration of the electrolyte of the RAIB batteries containing a  $\text{Sb}_2\text{Se}_3$  positive electrode after different cycles.

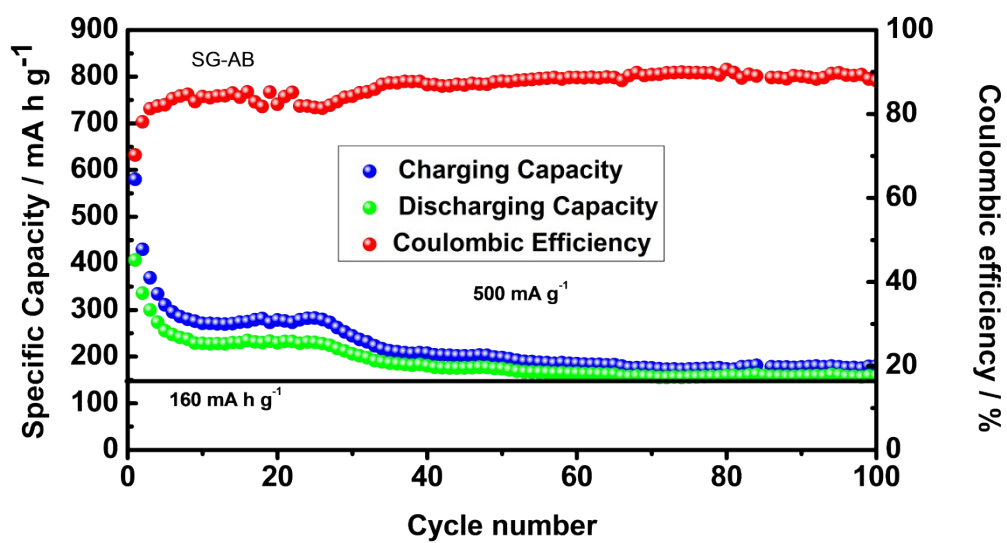

**Fig. S10** The cycling performance and the Coulombic efficiency of SG-AB at a current density of  $500 \text{ mA g}^{-1}$ .

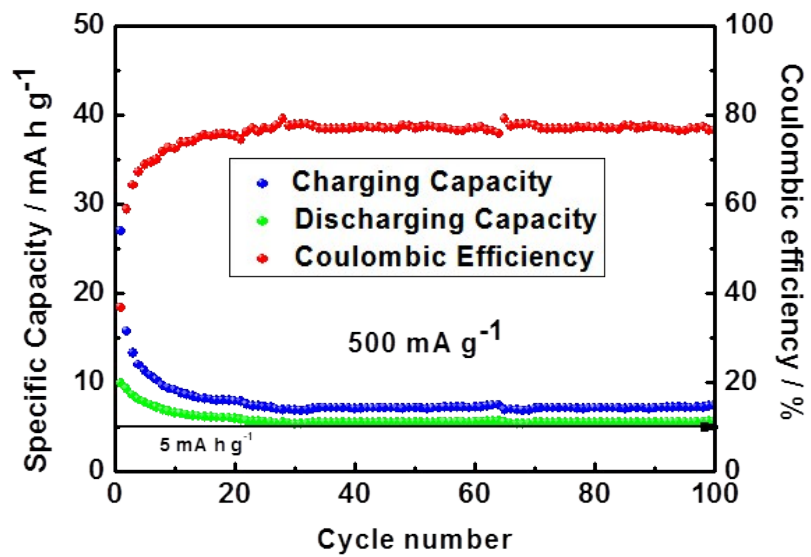

**Fig. S11** The cycling performance and the Coulombic efficiency of rGO at a current density of 500 mA g<sup>-1</sup>.

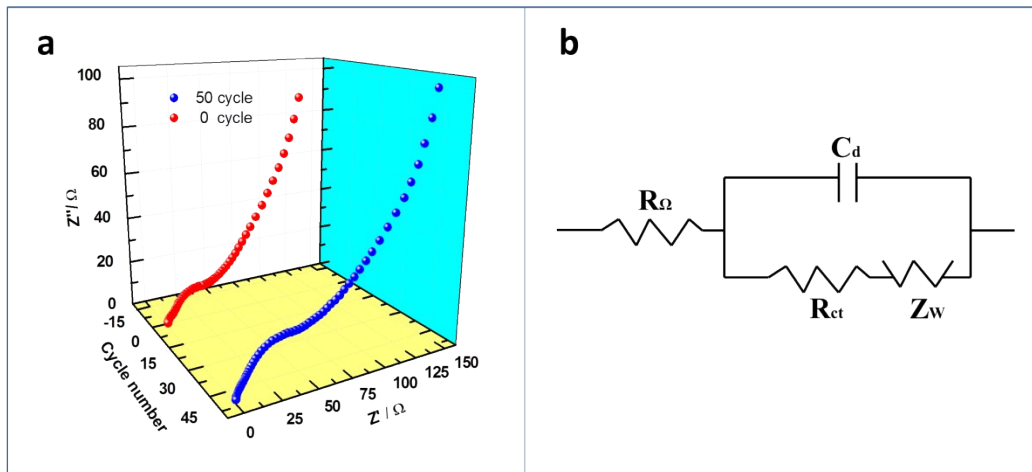

**Fig. S12** (a) The electrochemical impedance spectra (EIS) of SNG electrodes before and after 50 cycles. (b) Equivalent circuit model of battery system.

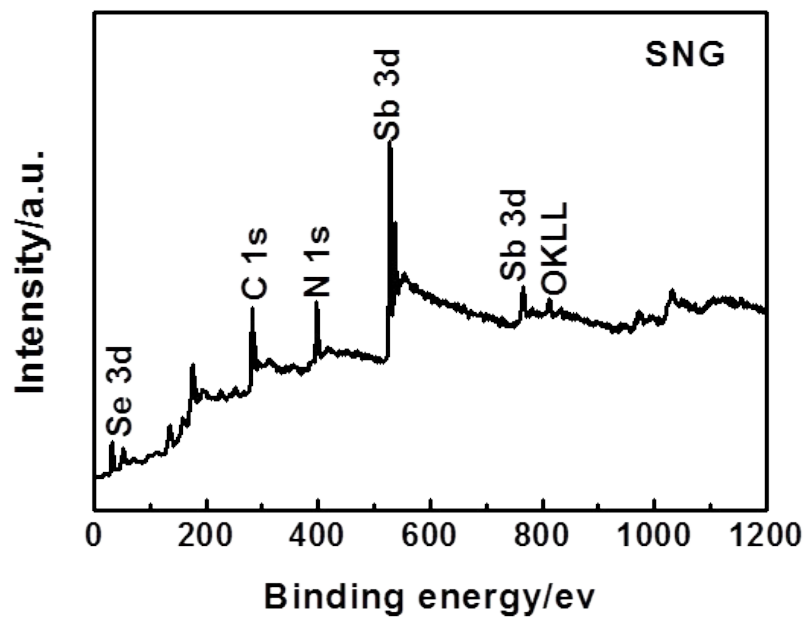

Fig. S13 XPS survey spectrum of the as-prepared SNG.

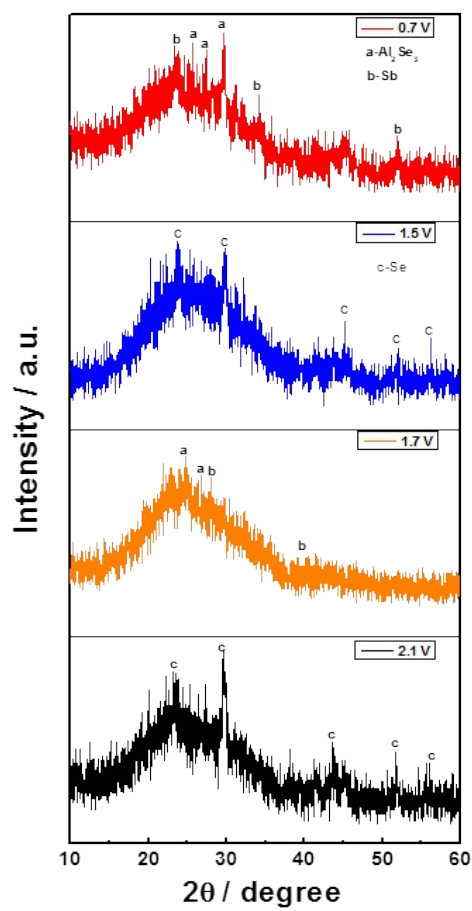

**Fig. S14** Ex-situ XRD patterns of the  $\text{Sb}_2\text{Se}_3$  electrode after different voltages.



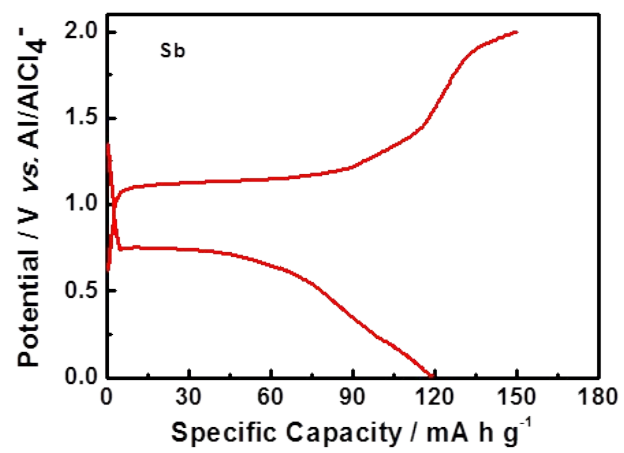

**Fig. S15** The charge/discharge curves of Sb.

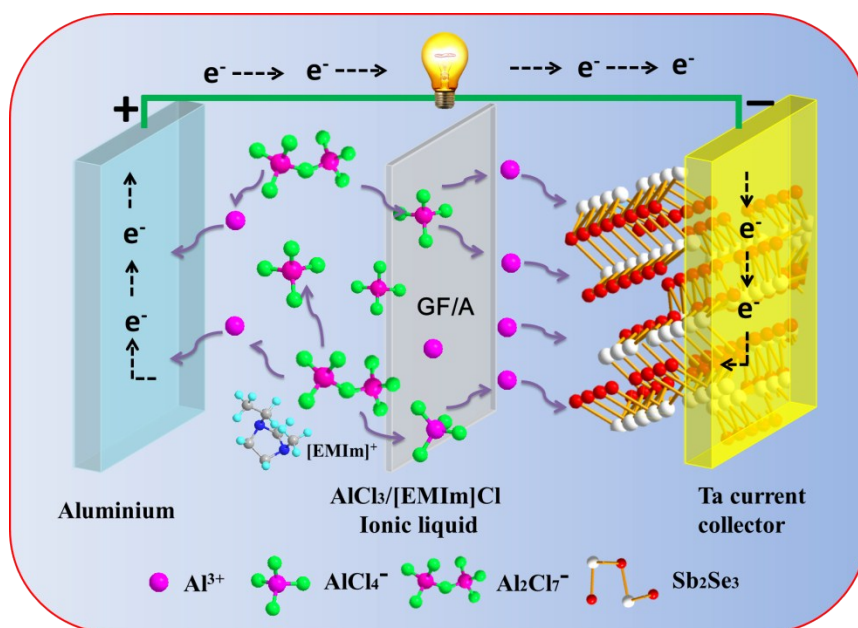

**Scheme. S1** The schematic representation of  $\text{Sb}_2\text{Se}_3$  as cathode for aluminum battery during discharge process.

**Table S2.** The theoretical redox potential calculation of Sb<sub>2</sub>Se<sub>3</sub>

| 2 Al + Sb <sub>2</sub> Se <sub>3</sub> = Al <sub>2</sub> Se <sub>3</sub> + 2 Sb ( n=0, m=2 ) |             |                            |             |       |
|----------------------------------------------------------------------------------------------|-------------|----------------------------|-------------|-------|
| T/°C                                                                                         | deltaH / KJ | deltaS / J K <sup>-1</sup> | deltaG / KJ | E / V |
| 25.000                                                                                       | -439.320    | -21.828                    | -432.812    | 0.75  |

$$\Delta G = -nEF$$

$$E = \frac{\Delta G}{-nF} \quad (F=96485 \text{ C / mol. } n: \text{ Transfer electron number})$$
